# Supplementary material
Source: publisher figshare collection journal article supplement (https://asha.figshare.com/articles/dataset/_/16906978)
Supplement: Supplementary file 1 [file 1]

## Supplemental Material S2. Dunn's test results.

| Variable         | Cluster A and B |          | Cluster A and C |          | Cluster B and C |          |
|------------------|-----------------|----------|-----------------|----------|-----------------|----------|
|                  | <i>z</i>        | <i>p</i> | <i>z</i>        | <i>p</i> | <i>z</i>        | <i>p</i> |
| Age              | −0.2            | .43      | 3.3             | .0005*   | 2.4             | .008*    |
| Receptive vocab  | 1               | .15      | 4.1             | < .0001* | 1.7             | .04*     |
| Expressive vocab | 2.8             | .002*    | 3.7             | .0001*   | −0.3            | .37      |
| Gestures         | 1.2             | .11      | 2.9             | < .0001* | 1.4             | .079     |
| Consonants       | 3.2             | .0006*   | 3.5             | .0003*   | −0.89           | .19      |
| Early 8          | 3.1             | .0009*   | 3.5             | .0003*   | −0.79           | .21      |
| Middle 8         | 3.6             | .0002*   | 3.3             | .0005*   | −1.4            | .09      |
| Late 8           | 3.3             | .0006*   | 3.4             | .0004*   | −0.96           | .17      |
| Syllables        |                 |          |                 |          |                 |          |
| V                | −3              | .0014*   | −2.5            | .006*    | 1.3             | .098     |
| CV               | 0.4             | .33      | −2.2            | .013*    | −1.96           | .025*    |
| CVC              | 2.4             | .008*    | 3.8             | .0001*   | 0.2             | .44      |
| VC               | 2.1             | .02*     | 3.5             | .0003*   | 0.3             | .38      |
| CCV              | 2.5             | .0006*   | 3.2             | .0007*   | −0.3            | .37      |
| CCVC             | 2.9             | .002*    | 3.9             | .0001*   | −0.3            | .37      |
| CVCC             | 2.7             | .003*    | 3.5             | .0002*   | −0.3            | .37      |
| VCC              | 2.4             | .008*    | 3.2             | .0006*   | −0.2            | .41      |
| CCVCC            | 2               | .02*     | 2.9             | .002*    | 0               | .5       |
| PCC              | 3.2             | .0008*   | 2.3             | .01*     | −0.9            | .18      |
| PVC              | 3.1             | .001*    | 1.9             | .03*     | −1.1            | .13      |
| PPC              | 3.1             | .0009*   | 2.2             | .02*     | −1              | .17      |

\* $p \leq .05$  Dunn's test

Receptive vocab = number of words understood on CDI (Fenson, et al., 2007); Expressive vocab = number of words expressed on CDI (Fenson, et al., 2007); Gestures = number of gestures used on CDI (Fenson, et al., 2007); consonants = total number of consonants in phoneme repertoire; Early 8, Middle 8, Late 8 consonants (Shriberg, 1993); syllable shapes = proportion of syllable shapes in spontaneous speech sample; V = vowel; C = consonant; PCC = percent consonants correct in spontaneous speech sample; PVC = percent vowels correct in spontaneous speech sample; PPC = percent phonemes correct in spontaneous speech sample.
